# Supplementary material
Source: Research Square preprint supplement (doi:10.21203/rs.3.rs-9940635/v1)
Supplement: Supplementary file 1 [file 2ae7a603ec5e5307a70e37f3.docx]

Table 1: Indicator System for Measuring the Compatibility Between Population Changes and the Scale of Higher Education

| System Level | Indicator Level | Concrete Content | Unit |
| --- | --- | --- | --- |
| Level of population change  (Demand Side) | Population Size | Year-end permanent resident population | ten thousand people |
| Population Increment | Number of the floating population | person |
| Population Structure | urbanization rate | % |
| Population Forecasting | birth rate | ‰ |
| The scale and level of higher education (Supply Side) | Supply Stock | Number of college students | ten thousand people |
| Incremental Supply | Annual enrollment | ten thousand people |
| Supply Structure | Number of higher education institutions | place |
| Supply Intensity | Number of college students per 10,000 people | person |
