# Supplementary material
Source: Research Square preprint supplement (doi:10.21203/rs.3.rs-9940635/v1)
Supplement: Supplementary file 2 [file 3b55d694f3d8a057baa2dd4e.docx]

Table 4 Compatibility Between Population Changes and University Education Scale in Guangdong Province (2015–2024)

|  | Y2015 | Y2016 | Y2017 | Y2018 | Y2019 | Y2020 | Y2021 | Y2022 | Y2023 | Y2024 |
| --- | --- | --- | --- | --- | --- | --- | --- | --- | --- | --- |
| Pearl River Delta | 0.7419 | 0.8909 | 0.9425 | 0.9329 | 0.9296 | 0.9360 | 0.9155 | 0.9092 | 0.9101 | 0.9111 |
| Eastern Guangdong | 0.1417 | 0.2832 | 0.2861 | 0.4133 | 0.4015 | 0.4307 | 0.3189 | 0.3123 | 0.3198 | 0.3174 |
| Western Guangdong | 0.4476 | 0.3528 | 0.4954 | 0.4937 | 0.4882 | 0.5088 | 0.4921 | 0.4813 | 0.4838 | 0.4947 |
| Northern Guangdong | 0.3999 | 0.5466 | 0.4068 | 0.5273 | 0.5282 | 0.5378 | 0.4521 | 0.4461 | 0.4394 | 0.4537 |
| Overall | 0.4328 | 0.5184 | 0.5327 | 0.5918 | 0.5869 | 0.6033 | 0.5447 | 0.5372 | 0.5383 | 0.5442 |
