# Supplementary material
Source: Research Square preprint supplement (doi:10.21203/rs.3.rs-9940635/v1)
Supplement: Supplementary file 3 [file 431379914d93033f7833d0d7.docx]

Table 5 Results of Population Change and University Education Scale Suitability in Guangdong Province (2015–2024)

|  | Y2015 | Y2016 | Y2017 | Y2018 | Y2019 | Y2020 | Y2021 | Y2022 | Y2023 | Y2024 |
| --- | --- | --- | --- | --- | --- | --- | --- | --- | --- | --- |
| Guangzhou | 0.8736 | 0.7327 | 0.8967 | 0.8941 | 0.889 | 0.9153 | 0.9071 | 0.9081 | 0.9084 | 0.9014 |
| Shenzhen | 0.5854 | 0.6503 | 0.5626 | 0.5682 | 0.5706 | 0.599 | 0.5778 | 0.5700 | 0.5558 | 0.6101 |
| Zhuhai | 0.6830 | 0.6688 | 0.7275 | 0.7194 | 0.7113 | 0.7082 | 0.6973 | 0.7133 | 0.6870 | 0.7006 |
| Shantou | 0.4549 | 0.5646 | 0.5405 | 0.5337 | 0.5081 | 0.5038 | 0.5130 | 0.5127 | 0.5554 | 0.5754 |
| Foshan | 0.4581 | 0.6234 | 0.6795 | 0.6903 | 0.6927 | 0.6727 | 0.6674 | 0.6734 | 0.6718 | 0.6787 |
| Shaoguan | 0.3641 | 0.4147 | 0.501 | 0.4709 | 0.4686 | 0.5019 | 0.4971 | 0.4926 | 0.4868 | 0.5065 |
| Heyuan | 0.4635 | 0.5400 | 0.5445 | 0.4997 | 0.4369 | 0.5173 | 0.4804 | 0.5276 | 0.5392 | 0.4985 |
| Meizhou | 0.4406 | 0.4678 | 0.487 | 0.4394 | 0.4833 | 0.4673 | 0.5055 | 0.5032 | 0.4849 | 0.5166 |
| Huizhou | 0.5294 | 0.5826 | 0.5314 | 0.5408 | 0.5240 | 0.5804 | 0.5370 | 0.5187 | 0.4947 | 0.4964 |
| Shanwei | 0.3295 | 0.2999 | 0.3493 | 0.3592 | 0.3953 | 0.4706 | 0.4321 | 0.4166 | 0.4359 | 0.4349 |
| Dongguan | 0.6492 | 0.6359 | 0.6554 | 0.6367 | 0.6164 | 0.6544 | 0.6135 | 0.6196 | 0.6220 | 0.6329 |
| Zhongshan | 0.6042 | 0.5400 | 0.6363 | 0.6334 | 0.6787 | 0.5690 | 0.5037 | 0.5269 | 0.5040 | 0.5038 |
| Jiangmen | 0.5653 | 0.5896 | 0.6146 | 0.5981 | 0.5735 | 0.6073 | 0.6158 | 0.6384 | 0.6096 | 0.6252 |
| Yangjiang | 0.5130 | 0.3934 | 0.5400 | 0.4965 | 0.5363 | 0.4845 | 0.5274 | 0.5502 | 0.5499 | 0.5326 |
| Zhanjiang | 0.5509 | 0.5092 | 0.5324 | 0.5488 | 0.5207 | 0.5589 | 0.5723 | 0.5741 | 0.5564 | 0.6091 |
| Maoming | 0.4325 | 0.5259 | 0.4507 | 0.5407 | 0.4657 | 0.4277 | 0.4819 | 0.4997 | 0.5563 | 0.5386 |
| Zhaoqing | 0.3240 | 0.6303 | 0.3580 | 0.3822 | 0.4812 | 0.5070 | 0.4672 | 0.4441 | 0.4305 | 0.4079 |
| Qingyuan | 0.4736 | 0.3919 | 0.4065 | 0.3841 | 0.3439 | 0.3969 | 0.4841 | 0.4883 | 0.4663 | 0.5178 |
| Chaozhou | 0.5256 | 0.2456 | 0.5682 | 0.5603 | 0.5351 | 0.549 | 0.5277 | 0.5329 | 0.5396 | 0.5469 |
| Jieyang | 0.2789 | 0.4086 | 0.3032 | 0.3352 | 0.3843 | 0.2804 | 0.3134 | 0.3358 | 0.3026 | 0.3373 |
| Yunfu | 0.4853 | 0.5100 | 0.4728 | 0.4909 | 0.4772 | 0.4601 | 0.4883 | 0.4711 | 0.4691 | 0.4904 |
