# Supplementary material
Source: Research Square preprint supplement (doi:10.21203/rs.3.rs-9940635/v1)
Supplement: Supplementary file 4 [file 4c03c17a4937e32b1c17e8a4.docx]

Table 3 Population Changes Index and University Education Scale Index in Guangdong Province (2015–2024)

|  | Y2015 | Y2016 | Y2017 | Y2018 | Y2019 | Y2020 | Y2021 | Y2022 | Y2023 | Y2024 |
| --- | --- | --- | --- | --- | --- | --- | --- | --- | --- | --- |
| Population Change Index | 0.1896 | 0.3233 | 0.6125 | 0.6962 | 0.7348 | 0.6601 | 0.6441 | 0.5369 | 0.5808 | 0.6551 |
| University Education Scale Index | 0.0109 | 0.0441 | 0.0769 | 0.1141 | 0.2224 | 0.7086 | 0.7347 | 0.8876 | 0.8530 | 0.9522 |
