# Supplementary material
Source: Research Square preprint supplement (doi:10.21203/rs.3.rs-9940635/v1)
Supplement: Supplementary file 5 [file 86851251c36a12ba944846c1.docx]

Table 2: Suitability Level Classification

| Suitability Range | Suitability Level |
| --- | --- |
| 0.0000≦A≦0.3999 | Very Low Suitability |
| 0.4000≦A≦0.5999 | Low Suitability |
| 0.6000≦A≦0.6999 | Moderate Suitability |
| 0.7000≦A≦0.7999 | Relatively High Suitability |
| 0.8000≦A≦1.0000 | High Suitability |
